# Supplementary material for: Pembrolizumab for the First-Line Treatment of Recurrent Locally Advanced or Metastatic Merkel Cell Carcinoma: Results from the Single-Arm, Open-Label, Phase III KEYNOTE-913 Study
Source: PubMed Central journal article supplement — Am J Clin Dermatol. 2024 Oct 8;25(6):987–96. doi: 10.1007/s40257-024-00885-w (PMC11511690; doi:10.1007/s40257-024-00885-w), 2024-10-08
Supplement: 40257_2024_885_MOESM1_ESM.pdf [file 40257_2024_885_MOESM1_ESM.pdf]

**SUPPLEMENT FOR: Pembrolizumab for the first-line treatment of recurrent locally advanced or metastatic Merkel cell carcinoma: results from the single-arm, open-label, phase III KEYNOTE-913 study**

**AUTHORS:** Laurent Mortier<sup>a</sup>, Lisa Villabona<sup>b</sup>, Ben Lawrence<sup>c</sup>, Ana Arance<sup>d</sup>, Marcus O. Butler<sup>e</sup>, Marie Beylot-Barry<sup>f</sup>, Philippe Saiag<sup>g</sup>, Mahtab Samimi<sup>h</sup>, Paolo A. Ascierto<sup>i</sup>, Francesca Spada<sup>j</sup>, Michel De Pontville<sup>k</sup>, Michele Maio<sup>l</sup>, Alfonso Berrocal<sup>m</sup>, Enrique Espinosa<sup>n</sup>, Jaume Capdevila<sup>o</sup>, Max Levin<sup>p</sup>, Debasmita Das<sup>q</sup>, Clemens Krepler<sup>q</sup>, Dmitri Grebennik<sup>q</sup>, Vanna Chiarion Sileni<sup>r</sup>

**AFFILIATIONS:** <sup>a</sup>Université Lille, CHRU Lille, 42 rue Paul Duez, Lille, France;

laurent.mortier@chru-lille.fr

<sup>b</sup>Karolinska University Hospital, Karolinska Vägen 22, Stockholm, Sweden;

lisa.villabona@sll.se

<sup>c</sup>University of Auckland, 34 Princes Street, Auckland, New Zealand;

benjaminla@adhb.govt.nz

<sup>d</sup>Hospital Clinic Barcelona and IDIBAPS, C. de Villarroel, 170 Barcelona, Spain;

amarance@clinic.cat

<sup>e</sup>Princess Margaret Cancer Centre, 27 King's College Cir, Toronto, ON, Canada'

marcus.butler@uhn.ca

<sup>f</sup>Centre Hospitalier Universitaire de Bordeaux, INSERM 1312, 1 Rue Jean Burguet,

Bordeaux, France; marie.beylot-barry@chu-bordeaux.fr

<sup>g</sup>Hôpital Ambroise Paré, APHP & EA4340, University of Versailles-SQY, and Paris-Saclay

University, 9 Av. Charles de Gaulle, Boulogne-Billancourt, France; philippe.saiag@uvsq.fr

<sup>h</sup>University of Tours, France; ISP1282 INRA University of Tours, 60 Rue du Plat d'Étain,

Tours, France; mahtab.samimi@univ-tours.fr

<sup>i</sup>Istituto Nazionale Tumori IRCCS Fondazione "G. Pascale," Via Mariano Semmola, 53,

Naples, Italy; paolo.ascierto@gmail.com

<sup>j</sup>Istituto Europeo di Oncologia (IEO) IRCCS, Milan, Via Giuseppe Ripamonti, 435, Italy;  
francesca.spada@ieo.it

<sup>k</sup>Centre Hospitalier Universitaire de Caen – Hôpital Côte de Nacre, Av. de la Côte de Nacre  
CS 30001, Caen, France; m.de-pontville@baclesse.unicancer.fr

<sup>l</sup>University of Siena and Center for Immuno-Oncology, University Hospital of Siena, Siena,  
Italy; mmaiocro@gmail.com

<sup>m</sup>Hospital General Universitario de Valencia, Avda. Tres Cruces, 2, Valencia, Spain;  
berrocal.alf@gmail.com

<sup>n</sup>Hospital Universitario La Paz, CIBERONC, P.º de la Castellana, 261, Madrid, Spain;  
eespinosa00@hotmail.com

<sup>o</sup>Vall d'Hebron University Hospital, Vall d'Hebron Institute of Oncology (VHIO), Pg. de la Vall  
d'Hebron, 119; Barcelona, Spain; jcapdevila@vhio.net

<sup>p</sup>University of Gothenburg and Sahlgrenska University Hospital, Universitetsplatsen 1,  
Gothenburg, Sweden; Max.Levin@wlab.gu.se

<sup>q</sup>Merck & Co., Inc., 120 E. Lincoln Ave, Rahway, NJ, USA; [debasmita.das1@merck.com](mailto:debasmita.das1@merck.com),  
[clemens.krepler@merck.com](mailto:clemens.krepler@merck.com), dmitri.grebennik@merck.com

<sup>r</sup>Istituto Oncologico Veneto IOV-IRCCS, Via Gattamelata, 64, Padua, Italy;  
vanna.chiarion@iov.veneto.it

**Fig. S1. Change from baseline over time in the sum of target lesions per RECIST v1.1 by BICR**

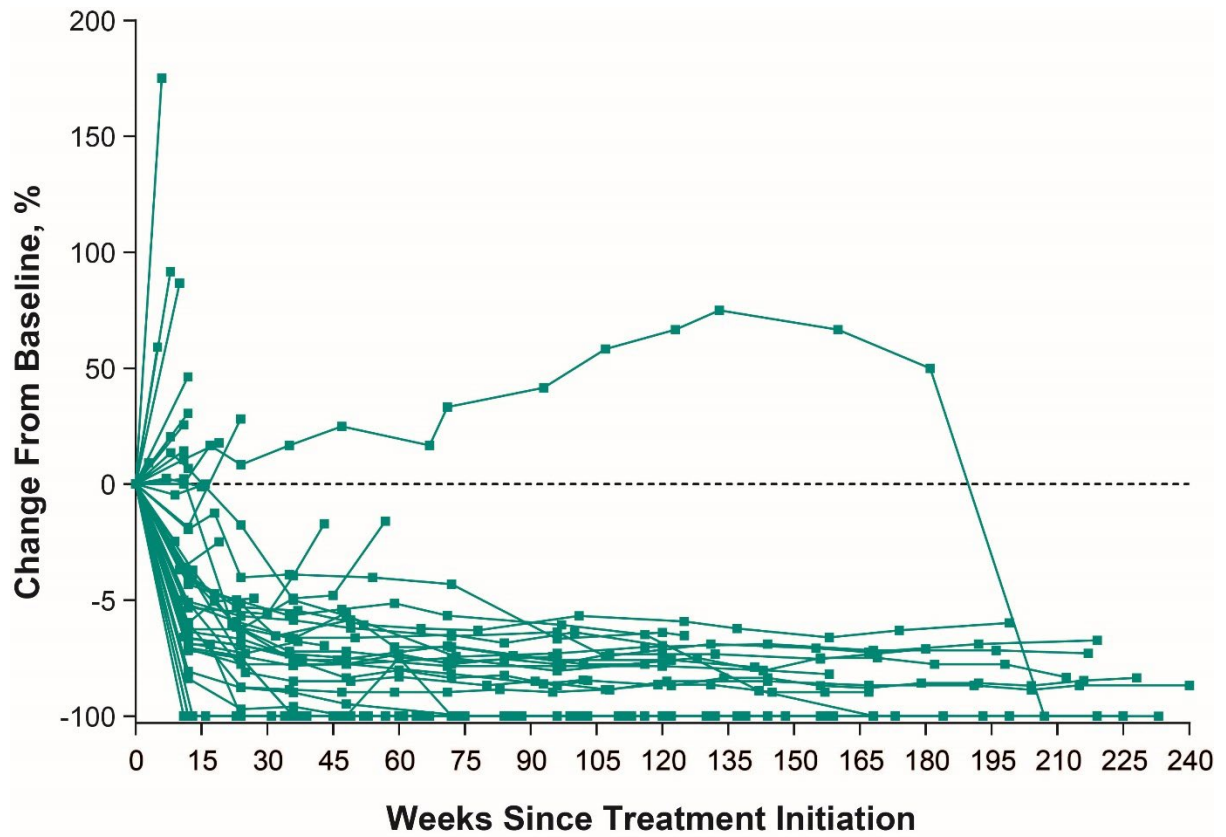

Abbreviations: BICR, blinded independent central review; RECIST v1.1, Response Evaluation Criteria in Solid Tumors, version 1.1.

**Table S1****Immune-mediated adverse events and infusion reactions.**

|                                                              | <b>All patients (n = 55)</b> |                  |
|--------------------------------------------------------------|------------------------------|------------------|
| <b>Immune-mediated adverse events and infusion reactions</b> |                              |                  |
| Any                                                          | 14 (25)                      |                  |
| Grade 3–5                                                    | 3 (5)                        |                  |
| Serious                                                      | 3 (5)                        |                  |
| Led to discontinuation                                       | 5 (9)                        |                  |
| Led to death                                                 | 1 (2) <sup>a</sup>           |                  |
| <b>Immune-mediated adverse events</b>                        | <b>Any grade</b>             | <b>Grade 3–5</b> |
| Hyperthyroidism                                              | 3 (5)                        | 0                |
| Hypothyroidism                                               | 3 (5)                        | 0                |
| Colitis                                                      | 2 (4)                        | 1 (2)            |
| Hypophysitis                                                 | 2 (4)                        | 0                |
| Pneumonitis                                                  | 2 (4)                        | 0                |
| Adrenal insufficiency                                        | 1 (2)                        | 0                |
| Encephalitis                                                 | 1 (2)                        | 1 (2)            |
| Guillain-Barré syndrome                                      | 1 (2)                        | 1 (2)            |
| Nephritis                                                    | 1 (2)                        | 0                |
| Severe skin reaction                                         | 1 (2)                        | 0                |

Data are n (%).

Adverse events of interest were based on a list of terms specified by the sponsor and were considered regardless of attribution to study treatment.

<sup>a</sup>One patient died of Guillain-Barré syndrome that was considered related to treatment.

**Table S2****Ethics committees and reference numbers**

| <b>IRB Name</b>                                                                        | <b>Reference Number</b>                                                           |
|----------------------------------------------------------------------------------------|-----------------------------------------------------------------------------------|
| Biomedical Research Alliance of New York IRB                                           | 3475-913-004                                                                      |
| NYU School of Medicine IRB                                                             | 3475-913-006                                                                      |
| University Health Network Research Ethics Board                                        | 3475-913-0051                                                                     |
| Horizon Health Network Research Ethics Board                                           | 3475-913-0055                                                                     |
| CPP Sud-Ouest et Outre-Mer I                                                           | 3475-913-0200<br>3475-913-0201<br>3475-913-0202<br>3475-913-0203<br>3475-913-0204 |
| Comitato Etico Istituto Oncologico Veneto                                              | 3475-913-0221                                                                     |
| Comitato Etico INT Pascale                                                             | 3475-913-0222                                                                     |
| Comitato Etico degli IRCCS Istituto Europeo di Oncologia e Centro Cardiologico Monzino | 3475-913-0223                                                                     |
| Comitato Etico Regione Toscana - Area Vasta Sud Est                                    | 3475-913-0224                                                                     |
| CEIm de la Comunidad Foral de Navarra C/ Irunlarrea 3                                  | 3475-913-0261<br>3475-913-0262<br>3475-913-0263<br>3475-913-0264                  |
| Regionala Etikprovningssamnden Goteborg                                                | 3475-913-0281<br>3475-913-0282                                                    |
| St. Vincents Hospital Sydney HREC                                                      | 3475-913-0400                                                                     |
| Hunter New England Human Research Ethics Committee                                     | 3475-913-0402                                                                     |
| Southern Health And Disability Ethics Committee                                        | 3475-913-0427                                                                     |
